# Supplementary material
Source: HighWire-hosted journal article supplement (https://jnm.snmjournals.org/highwire/filestream/93947/field_highwire_adjunct_files/2/49833_Supp_Fig_3.pdf)
Supplement: 49833_Supp_Fig_3.pdf [file 49833_Supp_Fig_3.pdf]

Iodo destannylation of *N*-succinimidyl 3-(trimethylstannyl)benzoate using *N*-Iodosuccinimide as electrophilic iodine source

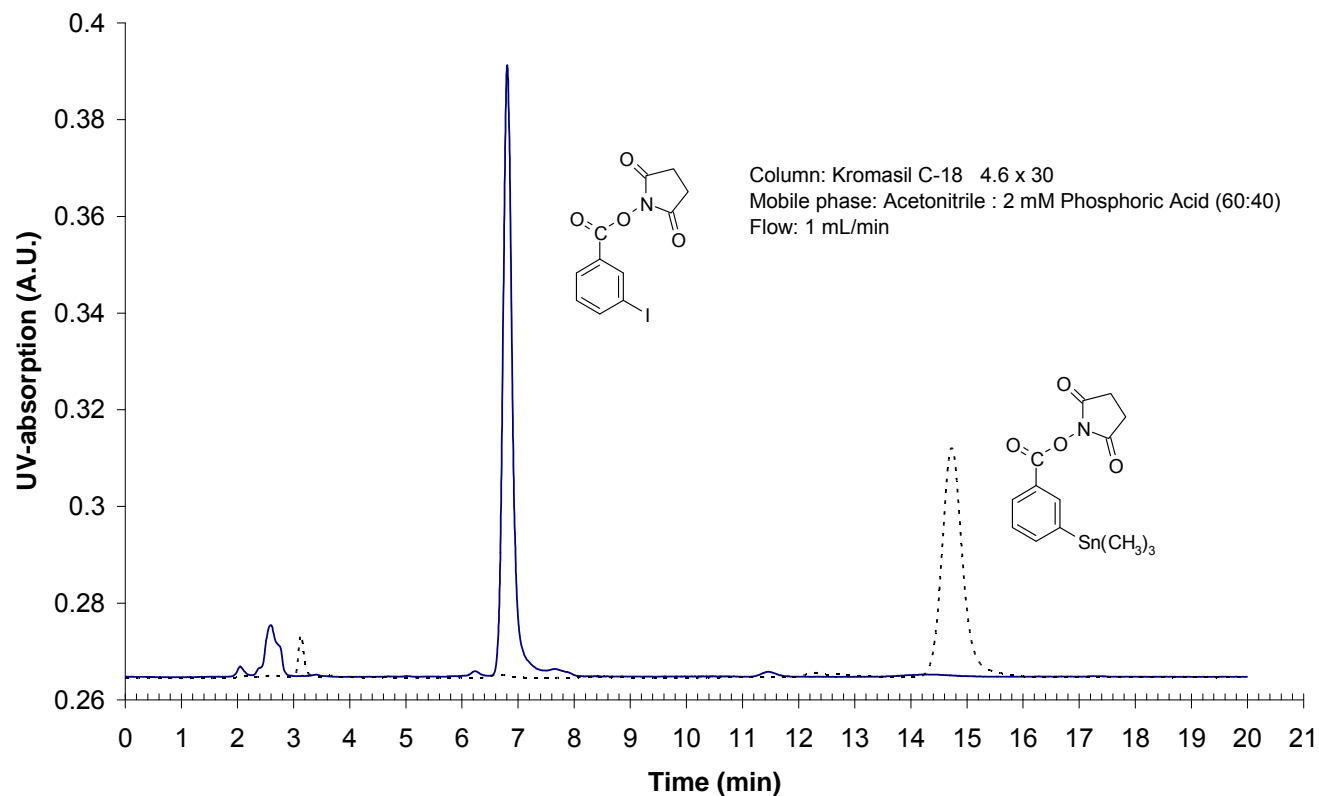

**Figure 3.** HPLC profile of *N*-succinimidyl 3-iodobenzoate, SIB, (solid line) following reaction of *N*-iodosuccinimide with *N*-succinimidyl 3-(trimethylstannyl)benzoate, m-MeATE, (dotted line). Reaction conditions: 1 nmole of m-MeATE was reacted with 10 nmole of NIS, in 10  $\mu$ l Methanol/1% Acetic acid, for 10 min. Corresponding NMR data of isolated product at 6.5-7.5 min is in agreement with *N*-succinimidyl 3-iodobenzoate:  $^1\text{H}$  NMR (600 MHz,  $\text{CDCl}_3$ )  $\delta$  2.91 (s, 4H, CO-CH<sub>2</sub>CH<sub>2</sub>-CO),  $\delta$  ~7.25 (t, C5-H),  $\delta$  8.01 (d, J = 7.9 Hz, 1H, C4-H),  $\delta$  8.10 (d, J = 7.9 Hz, 1H, C6-H)  $\delta$  8.47 (s, 1H, C2-H)
